# Supplementary material
Source: Springer Nature journal article supplement (https://www.springermedizin.de/resource/supplementary/13229_2011_34_MOESM9_ESM.PDF/9676016)
Supplement: MOESM9 [file 9676016]

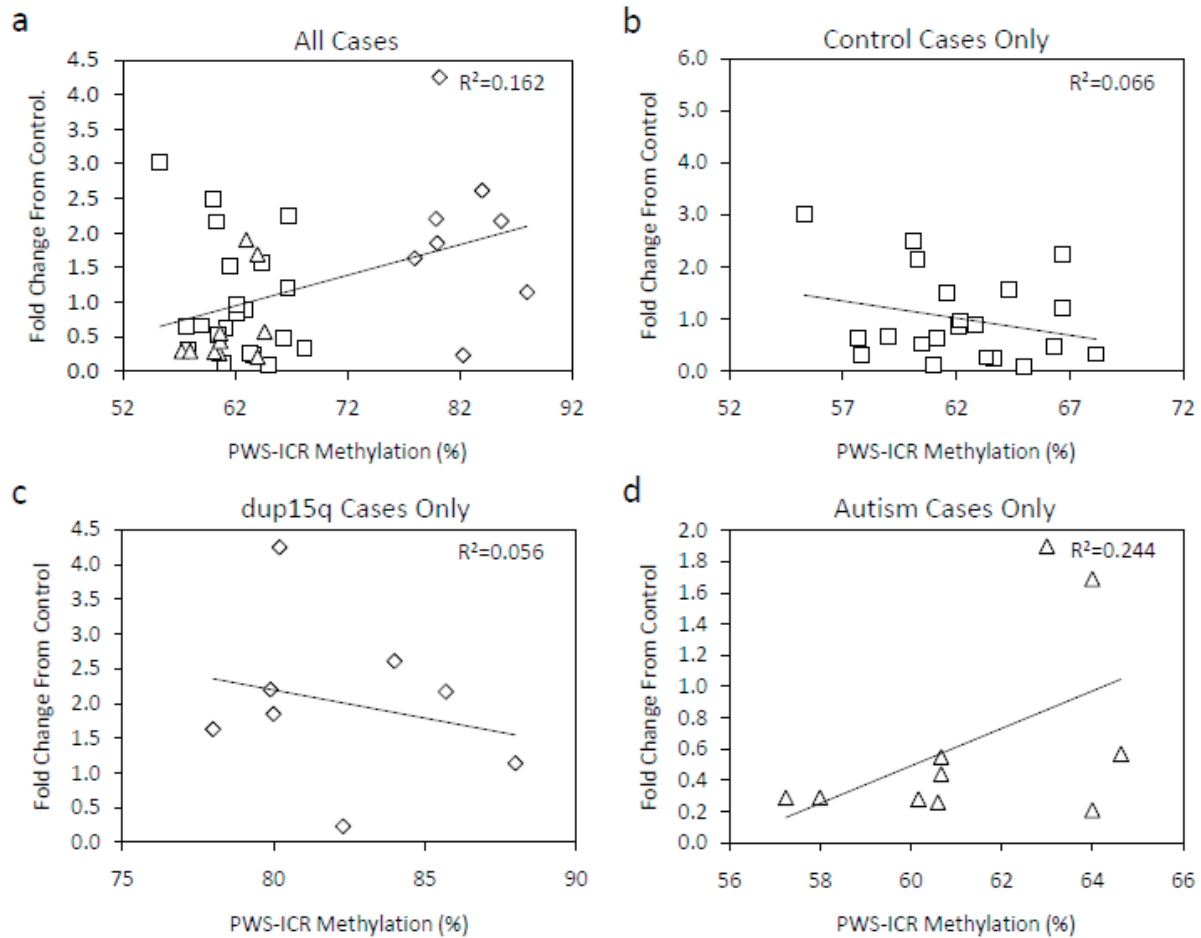

**UBE3A protein levels did not correlate with PWS-IC methylation.**

In all cases the positive trend between UBE3A protein level and methylation was similar to transcript level and methylation however it did not reach significance (a) nor did the other groups when analyzed separately (b-d). Significance was calculated by a simple regression analysis. (◇ Dup15q, △ Autism, □ Control)
